# Supplementary material
Source: MDPI journal article supplement (https://www.mdpi.com/2073-4352/10/4/317)
Supplement: s1 [file s1]

## SUPPLEMENTARY MATERIALS SECTION

### Hexnuclear Cadmium(II) Cluster Constructed from Tris(2-methylpyridyl)amine (TPA) and Azides

Franz A. Mautner <sup>1,\*</sup>, Roland C. Fischer <sup>2</sup>, Bailey R. Williams <sup>3</sup>, Salah S. Massoud <sup>3,4\*</sup>, Nahed M. H. Salem <sup>4</sup>

- <sup>1</sup> Institut für Physikalische and Theoretische Chemie, Technische Universität Graz, A-8010 Graz, Austria
- <sup>2</sup> Institut für Anorganische Chemie, Technische Universität Graz, Stremayrgasse 9/V, A-8010 Graz, Austria
- <sup>3</sup> Department of Chemistry, University of Louisiana at Lafayette, P.O. Box 43700 Lafayette, LA 70504, U.S.A.
- <sup>4</sup> Department of Chemistry, Faculty of Science, Alexandria University, Moharam Bey, Alexandria, Egypt
- \* Correspondence: [mautner@tugraz.at](mailto:mautner@tugraz.at) (F.A.M.); [ssmassoud@louisiana.edu](mailto:ssmassoud@louisiana.edu) (S.S.M.); Tel. ++43 316-4873-8234, fax: ++43 316-4873-8225 (F.A.M.); Tel. +01 337-482-5672, Fax: +01 337-482-5676 (S.S.M.).

| Table of Content                                                           | page number |
|----------------------------------------------------------------------------|-------------|
| X-ray crystal structure analysis                                           | 2           |
| <b>Table S1.</b> Crystallographic data and processing parameters           | 3           |
| <b>Table S2.</b> Selected bond lengths (Å) and angles (°)                  | 4           |
| <b>Table S3.</b> $\pi\cdots\pi$ ring $\cdots$ ring interactions            | 5           |
| <b>Table S4.</b> Possible hydrogen bonds                                   | 5           |
| <b>Fig. S1.</b> Observed (bottom) and simulated (top) X-ray powder pattern | 6           |

### *X-ray crystal structure analysis*

The X-ray single-crystal data of the title compound were collected on a Bruker-AXS APEX II CCD diffractometer at 100(2) K. The crystallographic data, conditions retained for the intensity data collection and some features of the structure refinements are listed in Table S1. The intensities were collected with Mo-K $\alpha$  radiation ( $\lambda$ = 0.71073 Å). Data processing, Lorentz-polarization and absorption corrections were performed using APEX and the SADABS computer programs [S1]. The structures were solved by direct methods and refined by full-matrix least-squares methods on F<sup>2</sup>, using the SHELX [S2] program library. All non-hydrogen atoms were refined anisotropically. The hydrogen atoms were located from difference Fourier maps, assigned with isotropic displacement factors and included in the final refinement cycles by use of geometrical constraints. Molecular plots were performed with the Mercury program. [S3]. Water molecules show twofold disorder with split occupancies of 0.778(7) for O1A and 0.222(7) for O1B, respectively.

### **References**

- [S1] (a) Bruker APEX, SAINT; (2006); Bruker AXS Inc. Madison, Wisconsin, USA;  
(b) G.M. Sheldrick (2001), SADABS v. 2. University of Goettingen, Germany.
- [S2] (a) G.M. Sheldrick, Acta Crystallogr. A64 (2008) 112;  
(b) G.M. Sheldrick, Acta Crystallogr. C71 (2015) 3.
- [S3] C.F. Macrae, P.R. Edington, P. McCabe, E. Pidcock, G.P. Shields, R. Taylor, T. Towler, J. van de Streek, J. Appl. Cryst. 39 (2006) 453.

**Table S1.** Crystallographic data and processing parameters

|                                        |                                                                                                 |
|----------------------------------------|-------------------------------------------------------------------------------------------------|
| Empirical formula                      | C <sub>72</sub> H <sub>76</sub> Cd <sub>6</sub> Cl <sub>2</sub> N <sub>46</sub> O <sub>10</sub> |
| Formula mass                           | 2491.15                                                                                         |
| System                                 | Monoclinic                                                                                      |
| Space group                            | P2 <sub>1</sub> /c                                                                              |
| a (Å)                                  | 12.747(3)                                                                                       |
| b (Å)                                  | 22.488(5)                                                                                       |
| c (Å)                                  | 16.219(3)                                                                                       |
| α (°)                                  | 90                                                                                              |
| β (°)                                  | 94.512(9)                                                                                       |
| γ (°)                                  | 90                                                                                              |
| V (Å <sup>3</sup> )                    | 4634.8(17)                                                                                      |
| Z                                      | 2                                                                                               |
| T (K)                                  | 100(2)                                                                                          |
| μ (mm <sup>-1</sup> )                  | 1.490                                                                                           |
| D <sub>calc</sub> (Mg/m <sup>3</sup> ) | 1.785                                                                                           |
| Crystal size (mm)                      | 0.23 × 0.18 × 0.15                                                                              |
| θ max (°)                              | 27.000                                                                                          |
| Data collected                         | 186288                                                                                          |
| Unique refl. / R <sub>int</sub>        | 10097 / 0.1091                                                                                  |
| Parameters                             | 629                                                                                             |
| Goodness-of-Fit on F <sup>2</sup>      | 1.056                                                                                           |
| R1 / wR2 (all data)                    | 0.0363 / 0.1001                                                                                 |

**Table S2.** Selected bond lengths (Å) and angles (°)

|              |            |               |            |
|--------------|------------|---------------|------------|
| Cd1-N2       | 2.325(3)   | Cd1-N3        | 2.356(3)   |
| Cd1-N8       | 2.371(3)   | Cd1-N4        | 2.392(3)   |
| Cd1-N1       | 2.505(3)   | Cd1-N19'      | 2.530(3)   |
| Cd1-N5       | 2.607(3)   | Cd2-N8        | 2.287(3)   |
| Cd2-N14      | 2.298(3)   | Cd2-N5        | 2.344(3)   |
| Cd2-N11'     | 2.374(3)   | Cd2-N11       | 2.378(3)   |
| Cd2-N17'     | 2.418(3)   | Cd3-N23       | 2.333(3)   |
| Cd3-N22      | 2.382(3)   | Cd3-N22       | 2.382(3)   |
| Cd3-N21      | 2.392(3)   | Cd3-N14       | 2.404(3)   |
| Cd3-N17      | 2.406(4)   | Cd3-N20       | 2.482(3)   |
| Cd3-N13      | 2.547(3)   | N5-N6         | 1.195(5)   |
| N6-N7        | 1.163(5)   | N8-N9         | 1.205(5)   |
| N9-N10       | 1.146(5)   | N11-N12       | 1.211(5)   |
| N12-N13      | 1.164(5)   | N14-N15       | 1.2218(5)  |
| N15-N16      | 1.151(5)   | N17-N18       | 1.194(4)   |
| N18-N19      | 1.162(4)   |               |            |
|              |            |               |            |
| Cd1-N5-N6    | 135.6(3)   | Cd2-N5-N6     | 117.0(3)   |
| Cd1-N5-Cd2   | 98.86(12)  | N5-N6-N7      | 179.6(5)   |
| Cd2-N8-N9    | 126.7(3)   | Cd1-N8-N9     | 118.5(2)   |
| Cd1-N8Cd2    | 107.82(13) | N8-N9-N10     | 178.1(4)   |
| Cd2'-N11-N12 | 112.2(2)   | Cd2-N11-N12   | 107.3(2)   |
| Cd2-N11-Cd2' | 95.86(12)  | N11-N12-N13   | 178.5(4)   |
| Cd2-N14-N15  | 118.0(3)   | Cd3-N14-N15   | 108.7(2)   |
| Cd2-N14-Cd3  | 132.84(14) | N14-N15-N16   | 179.0(4)   |
| Cd2'-N17-N18 | 107.0(2)   | Cd3-N17-N18   | 120.4(3)   |
| Cd2'-N17-Cd3 | 132.52(14) | N17-N18-N19   | 178.6(4)   |
| Cd1'-N19-N18 | 107.1(3)   | Cd3-N13-N12   | 106.0(2)   |
| N8-Cd2-N11'  | 169.51(12) | N5-Cd2-N11    | 171.99(11) |
| N14-Cd2-N17' | 169.11(11) | N11'-Cd2-N17' | 82.59(11)  |
| N8-Cd2-N14   | 103.28(12) | N1-Cd1-N3     | 68.99(11)  |
| N3-Cd1-N19   | 164.04(11) | N20-Cd3-N21   | 69.38(11)  |
| N14-Cd3-N22  | 162.41(11) |               |            |

Symmetry code: (') 1-x,1-y,1-z.

**Table S3.**  $\pi\cdots\pi$  ring $\cdots$ ring interactions <sup>a)</sup>

|        |        | Symmetry ring<br>B | Cg...Cg (Å) | Alpha (°) |
|--------|--------|--------------------|-------------|-----------|
| ring 2 | ring 4 | [1-x,1-y,2-z]      | 4.223(3)    | 35.5(2)   |
| ring 2 | ring 5 | [x,3/2-y,1/2+z]    | 4.475(3)    | 36.4(2)   |
| ring 3 | ring 5 | [x,3/2-y,1/2+z]    | 4.594(3)    | 52.1(2)   |
| ring 3 | ring 6 | [-x,1-y,1-z]       | 4.650(3)    | 58.0(2)   |
| ring 3 | ring 7 |                    | 4.566(3)    | 25.1(2)   |

<sup>a)</sup> Cg = center of gravity of ring, Alpha = dihedral angle between planes of rings.  
 Ring 2: [N2,C2-C6], ring 3: [N3,C8-C12], ring 4: [N4,C14-C18], ring 5: [N21,C20-C24],  
 ring 6: [N22,C26-C30], ring 7: [N23,C32-C36]

**Table S4.** Possible hydrogen bonds

| D-H...A <sup>1)</sup> | Symmetry of A      | D..A (Å) | D-H..A (°) |
|-----------------------|--------------------|----------|------------|
| O1A-H1AA...N7         |                    | 2.934(7) | 103.4      |
| O1A-H2AA...O1         |                    | 2.844(6) | 166.8      |
| C6-H6...N6            |                    | 3.178(5) | 121.3      |
| C7-H7A...O4           | [-1+x,3/2-y,1/2+z] | 3.433(5) | 163.4      |
| C9-H9...O2            | [-1+x,3/2-y,1/2+z] | 3.516(5) | 175.2      |
| C11-H11...O4          | [-1+x,y,z]         | 3.392(5) | 143.5      |
| C12-H12...N15         |                    | 3.366(5) | 148.8      |
| C25-H25B...N10        | [-x,1-y,1-z]       | 3.356(6) | 133.8      |
| C28-H28...O3          | [1-x,-1/2+y,1/2-z] | 3.385(6) | 166.0      |
| C36-H36...N13         |                    | 3.287(5) | 127.3      |

<sup>1)</sup> D = donor atom, A = acceptor atom,

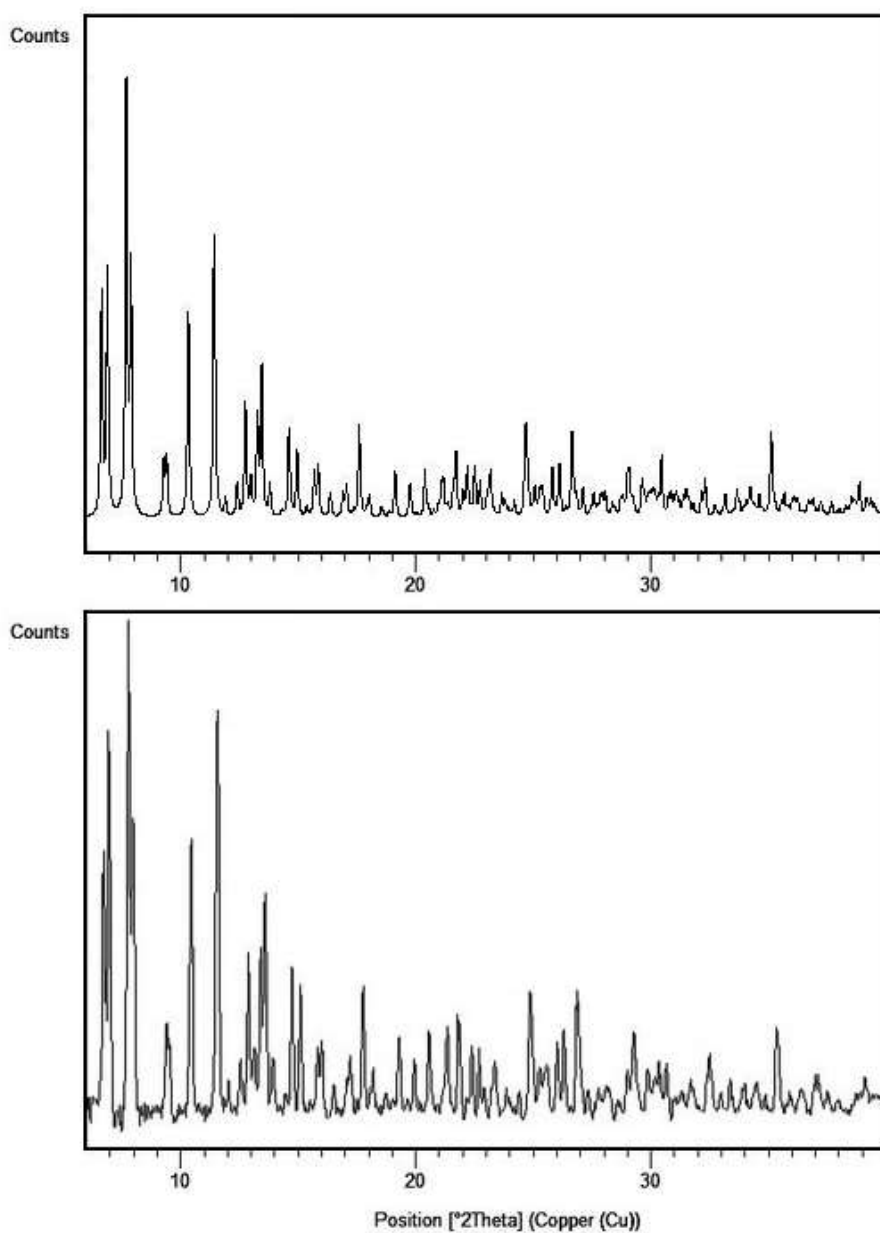

**Figure S1.** Observed (bottom) and simulated (top) X-ray powder pattern of the title complex. BRUKER D8 ADVANCE (Copper-K $\alpha$  2-Theta: 6-40°; 0.02°/step). PANALYTICAL X'PERT Highscore Plus full-pattern profile refinement:  $a = 12.802(2)$ ,  $b = 22.873(3)$ ,  $c = 16.296(2)$  Å,  $\beta = 94.254(8)^\circ$ .
